# Supplementary material for: VHL-deficient renal cancer cells gain resistance to mitochondria-activating apoptosis inducers by activating AKT through the IGF1R-PI3K pathway
Source: Springer Nature journal article supplement (doi:10.1007/s13277-016-5260-2), 2016-07-26
Supplement: MOESM1 [file 10520824]

**VHL deficient renal cancer cells gain resistance to mitochondria-activating apoptosis  
inducers by activating AKT through the IGF1R-PI3K pathway**

Ryuji Yamaguchi<sup>1,\*</sup>, Hiroshi Harada<sup>2,3</sup>, and Kiichi Hirota<sup>1</sup>

## Supplemental Information

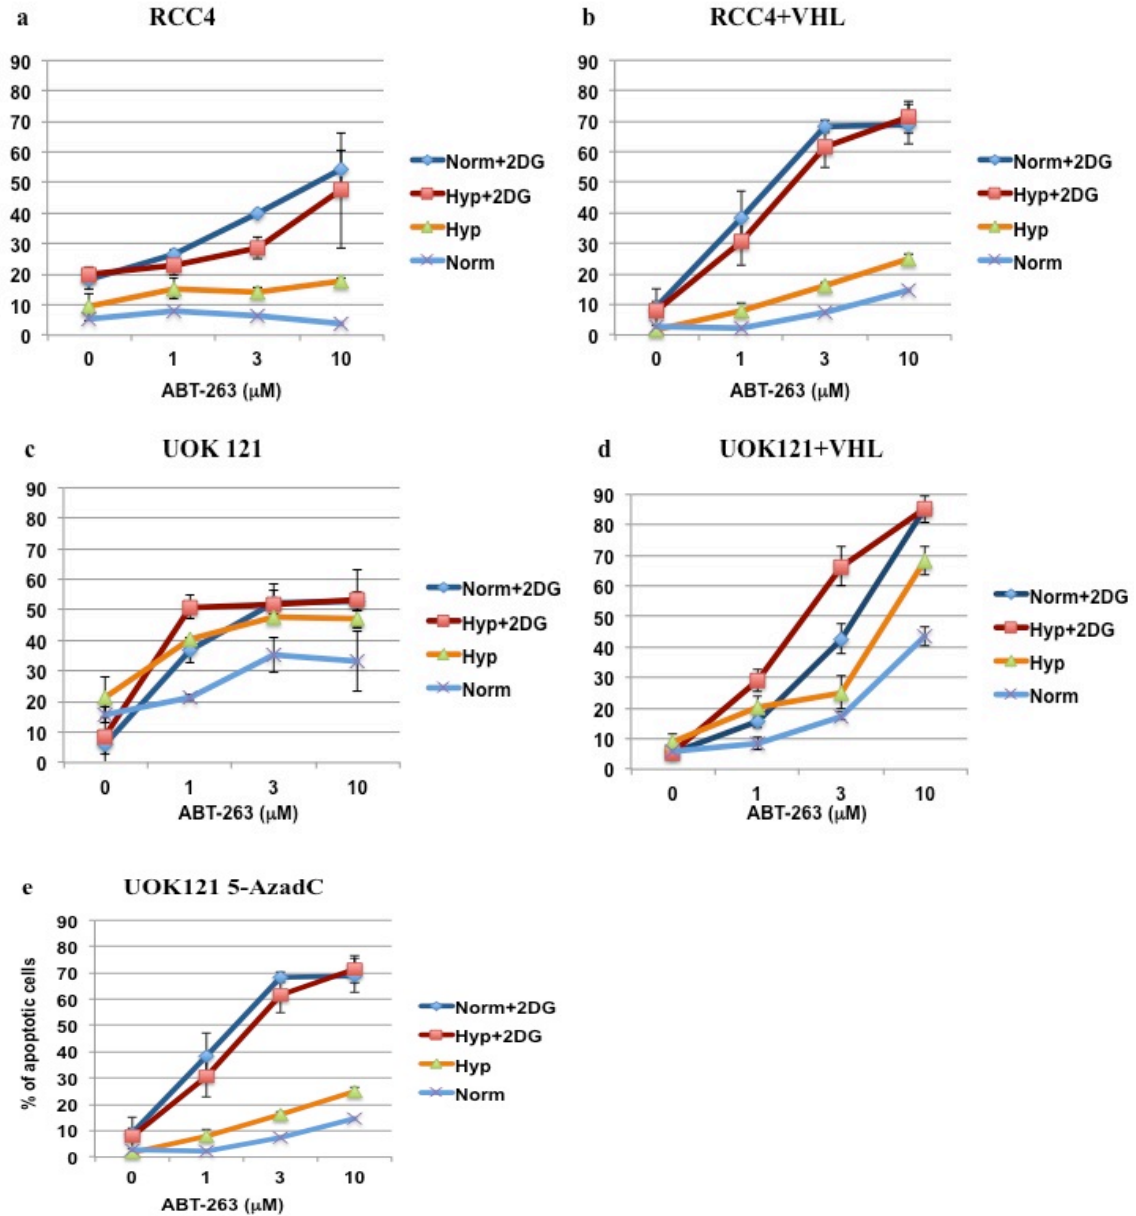

**Supplemental Figure 1.** The rates of apoptosis by 2DG-ABT were lower in VHL-deficient cancer cells under both normoxic and hypoxic conditions. (a-e) Renal cancer cell lines (a) RCC4, (b) RCC4+VHL, (c) UOK121, (d) UOL121+VHL and (e) UOK121 treated with 5-Aza-dC (UOK121+5-Aza-dC) to restore VHL expression, were all tested for sensitivity

to 2DG-ABT combination therapy; first with 10mM 2DG and then 2 hours later with ABT concentration varying from 0-10  $\mu$ M. Then at 4 hours from the start of the combination treatment, all cells were washed and re-incubated in fresh media. Cells were assayed under either normoxic (21% oxygen) or hypoxic (1% oxygen) conditions, and analyzed for propidium iodide incorporation by FACS.

**P-values for paired  $X^2$  tests**

|               | RCC4   | RCC4+VHL | UOK121 | UOK121+VHL |
|---------------|--------|----------|--------|------------|
| Norm vs Hypox | 0.9627 | 0.6490   | 0.0375 | 0.0181     |
| Unt vs 2DG    | 0.0009 | 0.0053   | 0.1742 | 0.0168     |

**Supplemental Table 1. P-values were calculated from data presented in Sup Fig 1 a-d.**

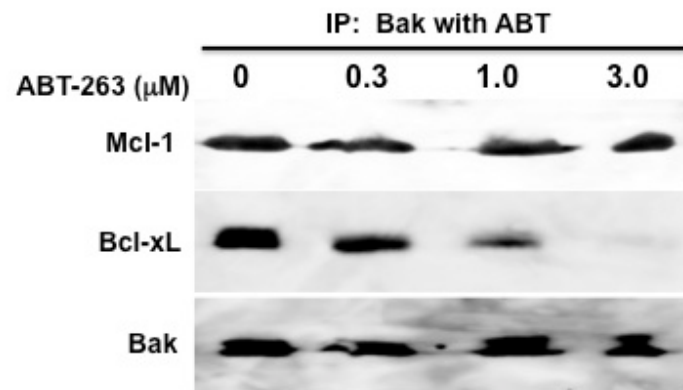

**Supplemental Figure 2.** Preliminary experiment: testing if ABT-263 in IP buffer could interfere with Bak-Bcl-xL association. Indicated amounts of ABT-263 was added to IP buffer containing untreated cells with Bak antibody conjugated with sepharose beads, as described in Materials and Methods.

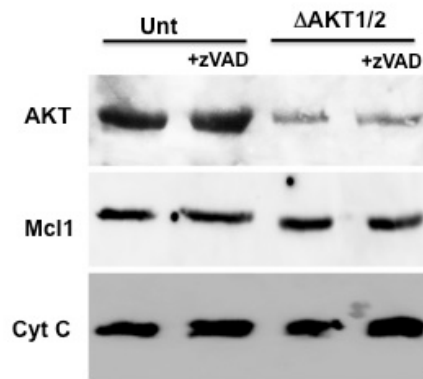

**Supplemental Figure 3. The loss of AKT1/2 caused slight shift in Mcl-1 mobility in the presence and absence of the pan-caspase inhibitor zVAD.** UOK121 cells were treated with siRNA to deplete AKT isoforms 1 & 2 for 30 hours in the presence and absence of zVAD. The sample was run together with indicated controls for western blots.
